# Supplementary material
Source: PubMed Central journal article supplement (PMC4418943)

Supplemental Figure 1. Frequency of HIBCH alteration across different studies available on cBioPortal for Cancer Genomics ([http://www.cbioportal.org/public-portal/cross\\_cancer.do?](http://www.cbioportal.org/public-portal/cross_cancer.do?)).

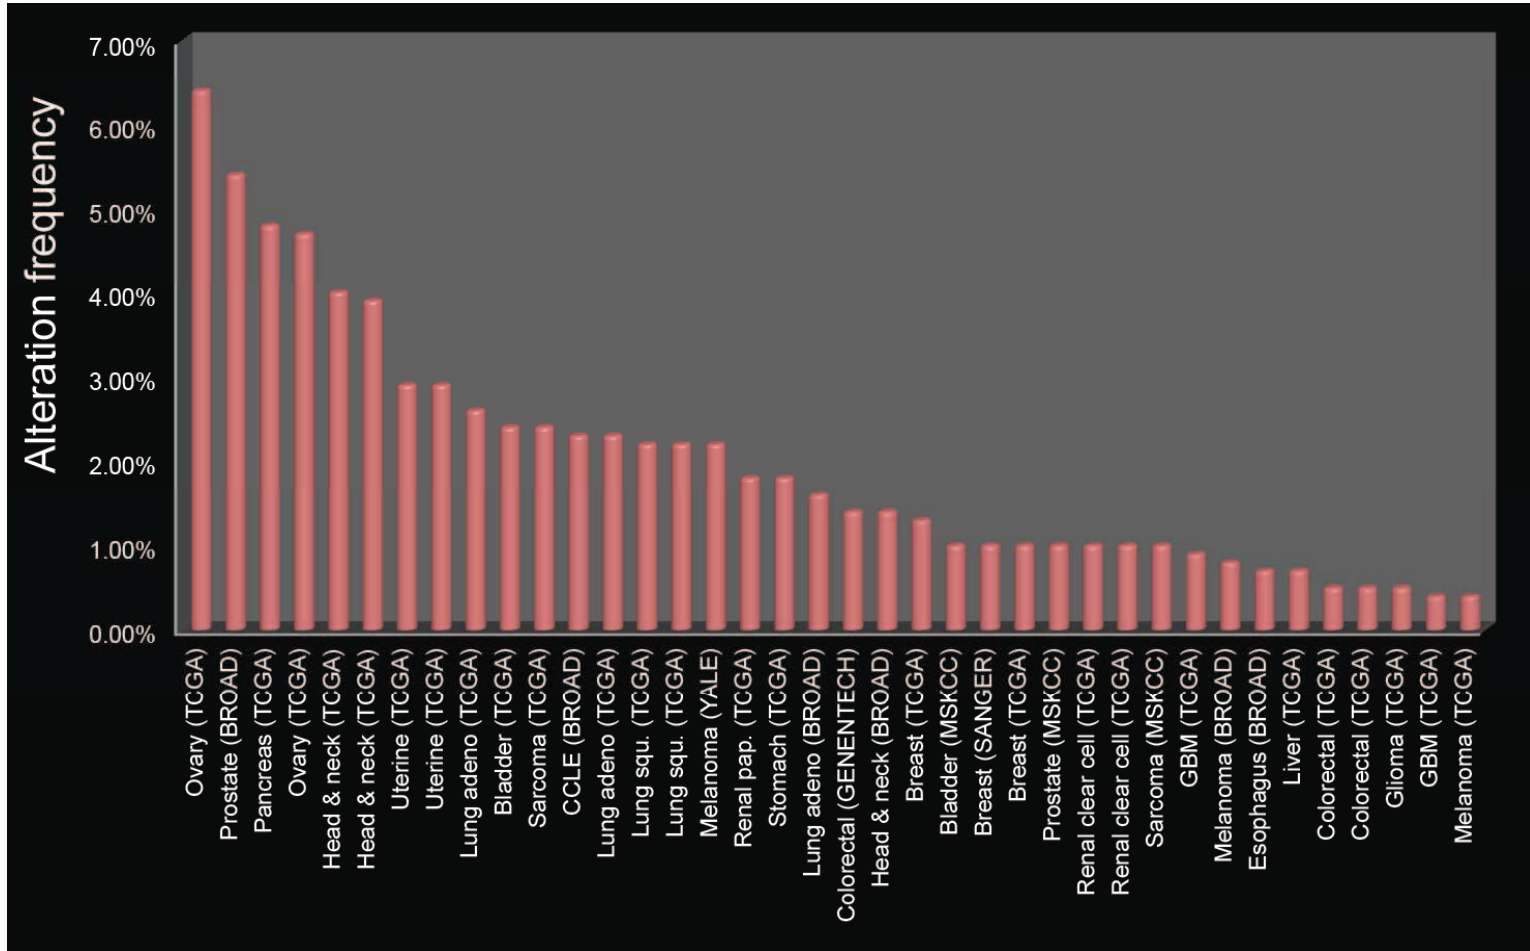

Supplement: NIHMS677805-supplement-Graph.pdf [file NIHMS677805-supplement-Graph.pdf]
